# Supplementary material
Source: HighWire-hosted journal article supplement (http://thorax.bmjjournals.com/highwire/filestream/174168/field_highwire_adjunct_files/0/Online_Supplement.pdf)
Supplement: Online_Supplement.pdf [file Online_Supplement.pdf]

## **Online Supplement**

### **Impaired type I and III interferon induction and rhinovirus control in human cystic fibrosis airway epithelial cells**

Marjolaine Vareille, Elisabeth Kieninger, Marco P. Alves, Brigitte S. Kopf, Alexander Möller, Thomas Geiser, Sebastian L. Johnston, Michael R. Edwards and Nicolas Regamey

## SUPPLEMENTAL METHODS

**Cell culture.** UNCCF2T/UNCN2T cells were grown in CnT-17 medium (CELLnTEC, Switzerland) supplemented with 1% Penicillin/Streptomycin and 10% fetal calf serum (FCS, Invitrogen US) in a humidified incubator (37°C, 5% CO<sub>2</sub>). CFBE41o-/16HBE14o- cells were grown in Minimum Essential Medium and IB3-1/IB3-S9 cells in Dulbecco's Modified Eagle Medium plus Glutamax, both additionally supplemented as above (InvivoGen, US).

**Virus culture.** The identities of each RV were confirmed by neutralisation using serotype specific antibodies. Virus stocks were negative for *Mycoplasma* infection.

**Primary human airway epithelial cells.** Nasal AECs were obtained by brushing the inferior surface of the middle turbinate of both nostrils with a 3-mm-cytology brush (Dent-o-Care, UK). Bronchial AECs were grown from brushings of the bronchial tree performed during clinically-indicated bronchoscopies or through the endotracheal tube in anaesthetised subjects undergoing elective surgery [E1]. Primary cultures were established by seeding freshly brushed cells into Bronchial Epithelial Growth Medium supplemented with Single Quots (Lonza, Switzerland), Primocin (100µg/ml; InvigoGen, US) and 10% FCS (Invitrogen, US). CF AECs were additionally treated with ceftazidime (100µg/ml; GlaxoSmithKline, Switzerland) and amphotericin B (2.5mg/l; Sigma, US) during first days of culture. Immunocytochemical staining for cytokeratin-13 and -19 (Abcam, UK) and occludin (Invitrogen, US) confirmed epithelial origin >95% of the cells obtained. At passage two, cells were seeded onto 12-well plates (Nunc, Rochester, US) until 80-90% confluency and placed into Bronchial Epithelial Basal Medium (Lonza, Switzerland) without any supplements for 24h prior to infection.

**RT-qPCR.** Cell lysates were obtained by adding 350µl of RLT-buffer (Qiagen, Switzerland). Total RNA was extracted (RNeasy Kit, Qiagen, Switzerland) and 2µg used for cDNA synthesis (Omniscript-RT-Kit, Qiagen, Switzerland). qPCR was carried out using specific primers (sense 300nM; antisense 900nM) and probes (175nM) for RV, IFN-λ1, IFN-λ2/3, IFN-β, IL-8, MxA, 2',5'-OAS, viperin, NOS2, Toll-like receptor 3 (TLR3), melanoma differentiation-associated gene 5 (MDA5), retinoic acid inducible gene I (RIG-I) and 18S (Supplemental Table E1). Reactions consisted of 2µl of cDNA (cDNA for 18S was diluted 1:100) and 12.5µl QuantiTect-Probe PCR-MasterMix (Qiagen, Switzerland) and were performed on iCycler® (Biorad, US). Gene expression was normalized to 18S rRNA, which has been shown to be a stable housekeeping gene for studies involving human airway epithelial cells [E2], and expressed as copies per µg of total RNA using a standard curve generated by amplification of plasmid DNA bearing the cDNA of the gene of interest.

Table E1. Sequences of primers and probes

| Gene     | Sequence of primers and probes                                                                                                    |
|----------|-----------------------------------------------------------------------------------------------------------------------------------|
| RV       | Forward-5'-GTGAAGAGCCSRTGTGCT-3'<br>Reverse-5'-GCTSCAGGGTTAAGGTTAGCC-3'<br>Probe-5'-FAM-TGAGTCCTCCGGCCCCGAATG-TAMRA-3'            |
| IFN-β    | Forward-5'-CGCCGATTGACCATCTA-3'<br>Reverse-5'-GACATTAGCCAGGAGTTCTCA-3'<br>Probe-5'-FAMTCAGACAAGATTCATCTAGCACTGGCTGGATAMRA-3'      |
| IFN-λ1   | Forward-5'-GGACGCCTTGAAGAGTCACT-3'<br>Reverse-5'-AGAAGCCTCAGTCCCAATTC-3'<br>Probe-5'-FAMAGTTGCAGCTCTCCTGTCTCCCCGTAMRA-3'          |
| IFN-λ2/3 | Forward-5'-CTGCCACATAGCCCAGTTCA-3'<br>Reverse-5'-AGAAGCGACTCTTCTAAGGCATCTT-3'<br>Probe-5'-FAMTCTCCACAGGAGCTGCAGGCCTTTATAMRA-3'    |
| IL-8     | Forward-5'-TTGGCAGCCTTCTCATTTTC-3'<br>Reverse-5'-TATGCACTGACATCTAAGTTCTTTAGCA-3'<br>Probe-5'-FAMCCTTGGCAAACTGCACCTTCACACATAMRA-3' |
| MxA      | Forward-5'-CAGCACCTGATGGCCTATCAC-3'<br>Reverse-5'-CATGAACTGGATGATCAAAGG-3'<br>Probe-5'-FAMAGGCCAGCAAGCGCATCTCCAGTAMRA-3'          |
| Viperin  | Forward-5'-CACAAAGAAGTGTCTGCTTGGT-3'<br>Reverse-5'-AAGCGCATATATTTTCATCCAGAATAAG-3'                                                |

|           |                                                                                                                                       |
|-----------|---------------------------------------------------------------------------------------------------------------------------------------|
|           | Probe-5'-FAMCCTGAATCTAACCAGAAGATGAAAGACTCCTAMRA-3'                                                                                    |
| 2',5'-OAS | Forward-5'-CTGACFCTGACCTGGTTGTCT-3'<br>Reverse-5'-CCCCGGCGATTAACTGAT-3'<br>Probe-5'-FAMCCTCAGTCTCTCACCACITTTTCATAMRA-3'               |
| NOS2      | Forward-5'-GGTGGAAGCGGTAACAAAGG-3'<br>Reverse-5'-TGCTTGGTGGCGAAGATGA-3'<br>Probe-5'-FAMAGAAACAACAGGAACCTACCAACTGACGGGTAMRA-3'         |
| TLR3      | Forward-5'-AAATTAAGAGTTTTTCTCCAGGGTGT-3'<br>Reverse-5'-ATTCCGAATGCTTGTGTTTGC-3'<br>Probe-5'-FAM-TTTGGCCTCTTTCTGAACAATGTCCAGC-TAMRA-3' |
| RIG-I     | Forward-5'-CCAAGCCAAAGCAGTTTTCAA-3'<br>Reverse-5'-CACATGGATTCCCCAGTCATG-3'<br>Probe-5'-FAM-TTGAAAAAAGAGCAAAGATATTCTGTGCCCGAC-TAMRA-3' |
| MDA5      | Forward-5'-GATTCAGGCACCATGGGAAGT-3'<br>Reverse-5'-AGGCCTGAGCTGGAGTTCCTG-3'<br>Probe-5'-FAM-GGGATGCTCTTGTGCCACATTCTTT-TAMRA-3'         |
| CFTR      | Forward-5'-AGCTGTCAAGCCGTGTTCTAGATA-3'<br>Reverse-5'-ATGAGGAGTGCCACTTGCAAA-3'<br>Probe-5'-FAM-CACACGAAATGTGCCAATGCAAGTCCTT-TAMRA-3'   |
| 18S       | Forward-5'-CGCCGCTAGGGTGAAATTCT-3'<br>Reverse-5'-CATTCTTGGCAAATGCTTTTCG-3'<br>Probe-5'-FAMACCGGCGCAAGACGGACCAGATAMRA-3'               |

---

**ELISA.** IFN- $\beta$  and IL-8 proteins were quantified in supernatants from untreated and infected cell cultures using ELISA-kits for human IFN- $\beta$  (Biosource International, US) and IL-8 (Amersham Biosciences, US) according to the manufacturer's instructions. The detection limits were 2.5U/ml (IFN- $\beta$ ) and 3.5pg/ml (IL-8). To quantify IFN- $\lambda_f$  in supernatants, we used a monoclonal anti-human IFN- $\lambda_1$  as capture-antibody, a polyclonal anti-IFN- $\lambda_1$  as secondary-antibody and biotin-conjugated donkey-anti-goat-IgG as third-antibody (R&D Systems, US), followed by streptavidin-conjugated horseradish-peroxidase (Biosource, US). Recombinant human IFN- $\lambda_1$  (Peprotech, US) was used as standard. The sensitivity of the assay was 25pg/ml. This assay also detects IFN- $\lambda_{2/3}$  due to 25% cross-reactivity [E3].

**Biological effect of IFN- $\beta$  and IFN- $\lambda$ .** Cells were seeded and treated for 24h before and for up to 48 hours after RV infection with/without different doses of IFN- $\beta$  and/or IFN- $\lambda_1$

(Peprotech, US).

**Cytotoxicity.** Cytotoxicity was assessed by measuring LDH activity in culture supernatants (Cytotoxicity Detection Kit; Roche, Switzerland).

**Transfection and RNA interference.** Healthy primary nasal AECs were cultured until 80-90% confluency and transfected with 100pmol of scrambled control or three different CFTR siRNAs by using lipofectamin 2000 (Invitrogen, US) according to manufacturer's instructions. Following sequences of functional-siRNAs were used: siCFTR.1 (5'-CGUGUGUCUGUAAACUGAUGGCUAA-3'), siCFTR.2 (5'-CCCUUCUGUUGAUUCUGCUGACAAU-3'), siCFTR.3 (5'-GGCAUAGGCUUAUGCC UUCUCUUUA-3'). Control-siRNA for the exclusion of non-target effects was 5'-UACCGUCUCCACUUGAUCGdTdT-3' (E4).

**Statistics.** Descriptive statistics and analyses were performed using Stata™ (STATA Corporation, College Station, US). As most of the data were not normally distributed, we present them as median (interquartile range [IQR]). P-values <0.05 were considered statistically significant.

## **SUPPLEMENTAL REFERENCES**

- E1. McNamara PS, Kicic A, Sutanto EN, et al. Comparison of techniques for obtaining lower airway epithelial cells from children. *Eur Respir J* 2008;32(3):763-8.
- E2. He JQ, Sandford AJ, Wang IM, et al. Selection of housekeeping genes for real-time PCR in atopic human bronchial epithelial cells. *Eur Respir J* 2008;32(3):755-62.
- E3. Contoli M, Message SD, Laza-Stanca V, et al. Role of deficient type III interferon-lambda production in asthma exacerbations. *Nat Med* 2006;12(9):1023-6.
- E4. Luciani A, Vilella VR, Esposito S, et al. Defective CFTR induces aggresome formation and lung inflammation in cystic fibrosis through ROS-mediated autophagy inhibition. *Nature cell biology*;12(9):863-75.

## **SUPPLEMENTAL FIGURE LEGENDS**

**Figure E1. Exogenous IFN decreases RV-induced cytotoxicity in CF bronchial epithelial cells** (UNCN2T/UNCCF2T cell line). Cytotoxicity (%), assessed by measuring LDH activity in supernatants, was determined after exposure to RV16 in the presence or absence of exogenous IFN- $\beta$  (100 pg/ml) and IFN- $\lambda$  (100 pg/ml) at different timepoints (8h, 24h, 48h) and compared to untreated cells. Cytotoxicity was significantly increased in CF cells compared to non-CF cells ( $p=0.02$ ). There was a reduction in cytotoxicity in CF cells treated with IFN- $\beta$  and/or IFN- $\lambda$  to the level of control cells ( $p=0.004$  for both IFN- $\beta$  and IFN- $\lambda$ ). Data are presented as median (IQR) of 3-4 independent experiments.

**Figure E2. Similar expression of double-stranded RNA recognition receptors in CF and non-CF primary airway epithelial cells.** Basal expression of MDA5 (A), TLR3 (B) and RIG-I (C) were measured by RT-qPCR in primary bronchial epithelial cells obtained from CF patients or healthy control donors. Expression of all receptors was similar in CF and non-CF cells. Data are presented as median (IQR) of 4 CF subjects and 4 healthy controls.
